# Supplementary material for: Cortical Activation to Action Perception is Associated with Action Production Abilities in Young Infants
Source: PubMed Central journal article supplement (PMC4303799; doi:10.1093/cercor/bht207), 2013-08-23
Supplement: supp_bht207_bht207supp_table1.pdf [file supp_bht207_bht207supp_table1.pdf]

*Manual Action Condition**Eye Gaze Condition*

| <b>Ch</b> | <i>t</i> | <i>p</i> | <i>df</i> | <b>Ch</b> | <i>t</i> | <i>p</i> | <i>df</i> |
|-----------|----------|----------|-----------|-----------|----------|----------|-----------|
| <b>1</b>  | 3.63     | 0.001    | 23        | <b>1</b>  | 3.58     | 0.002    | 22        |
| <b>5</b>  | 2.85     | 0.009    | 22        | <b>2</b>  | 3.89     | <0.001   | 23        |
| <b>9</b>  | 3.58     | 0.002    | 21        | <b>4</b>  | 3.32     | 0.003    | 23        |
| <b>13</b> | 3.34     | 0.003    | 23        | <b>5</b>  | 5.43     | <0.001   | 22        |
| <b>14</b> | 4.81     | <0.001   | 23        | <b>8</b>  | 3.69     | 0.0015   | 19        |
| <b>15</b> | 4.93     | <0.001   | 23        | <b>9</b>  | 5.26     | <0.001   | 21        |
| <b>28</b> | 6.67     | <0.001   | 14        | <b>10</b> | 4.31     | <0.001   | 22        |
| <b>32</b> | 5.14     | <0.001   | 23        | <b>13</b> | 2.23     | 0.036    | 23        |
|           |          |          |           | <b>14</b> | 6.17     | <0.001   | 23        |
|           |          |          |           | <b>15</b> | 4.32     | <0.001   | 23        |
|           |          |          |           | <b>28</b> | 6.51     | <0.001   | 14        |
|           |          |          |           | <b>32</b> | 5.36     | <0.001   | 23        |
|           |          |          |           | <b>33</b> | 4.00     | <0.001   | 23        |
