# Supplementary material for: Cortical Activation to Action Perception is Associated with Action Production Abilities in Young Infants
Source: PubMed Central journal article supplement (PMC4303799; doi:10.1093/cercor/bht207), 2013-08-23
Supplement: supp_bht207_bht207supp_table2.pdf [file supp_bht207_bht207supp_table2.pdf]

| <i>Age</i> | Mullen Scale of Early Learning (percentile rank) |                   | Manual Dexterity Task (average rank score) | Proportion of time look at ROI in manual action condition ^ |             | Proportion of time look at ROI in eye gaze condition ^ | Average total look per valid trial per condition * |                 |
|------------|--------------------------------------------------|-------------------|--------------------------------------------|-------------------------------------------------------------|-------------|--------------------------------------------------------|----------------------------------------------------|-----------------|
|            | <i>Standard</i>                                  | <i>Fine motor</i> | <i>Grasp quality</i>                       | <i>Hand</i>                                                 | <i>Face</i> | <i>Face</i>                                            | <i>Manual action</i>                               | <i>Eye gaze</i> |
| 174        | 89                                               | 16                | 4.5                                        | n/a                                                         | n/a         | n/a                                                    | n/a                                                | n/a             |
| 143        | 113                                              | 84                | 4                                          | n/a                                                         | n/a         | n/a                                                    | n/a                                                | n/a             |
| 153        | 92                                               | 16                | 4.25                                       | n/a                                                         | n/a         | n/a                                                    | n/a                                                | n/a             |
| 153        | 89                                               | 34                | 3.75                                       | 0.68                                                        | 0.374       | 0.824                                                  | 9.3                                                | 7.75            |
| 174        | 89                                               | 34                | 3.75                                       | 0.273                                                       | 0.784       | 0.945                                                  | 7.24                                               | 6.48            |
| 149        | 96                                               | 18                | 1                                          | 0.153                                                       | 0.815       | 0.944                                                  | 5.19                                               | 5.39            |
| 138        | 110                                              | 66                | 3.75                                       | 0.541                                                       | 0.373       | 0.756                                                  | 6.78                                               | 6.85            |
| 156        | 95                                               | 82                | 4.75                                       | n/a                                                         | n/a         | n/a                                                    | n/a                                                | n/a             |
| 141        | 103                                              | 66                | 3                                          | n/a                                                         | n/a         | n/a                                                    | n/a                                                | n/a             |
| 160        | 98                                               | 62                | 3.25                                       | n/a                                                         | n/a         | n/a                                                    | n/a                                                | n/a             |
| 156        | 102                                              | 34                | n/a                                        | n/a                                                         | n/a         | n/a                                                    | n/a                                                | n/a             |
| 167        | 95                                               | 34                | 4.25                                       | 0.264                                                       | 0.621       | 0.829                                                  | 7.69                                               | 6.51            |
| 144        | 107                                              | 66                | 4.5                                        | 0.515                                                       | 0.429       | 0.837                                                  | 9.34                                               | 6.12            |
| 167        | 117                                              | 98                | n/a                                        | 0.192                                                       | 0.733       | 0.934                                                  | 7.15                                               | 6.9             |
| 134        | 103                                              | 38                | n/a                                        | 0.155                                                       | 0.764       | 0.965                                                  | 7.25                                               | 7.93            |
| 162        | 98                                               | 34                | n/a                                        | 0.309                                                       | 0.633       | 0.887                                                  | 8.32                                               | 6.64            |
| 148        | 113                                              | 84                | n/a                                        | 0.25                                                        | 0.556       | 0.792                                                  | 8.23                                               | 8.16            |
| 172        | 116                                              | 93                | 5.33                                       | 0.328                                                       | 0.613       | 0.97                                                   | 6.7                                                | 6.94            |
| 174        | 115                                              | 82                | 4.25                                       | 0.239                                                       | 0.727       | 0.952                                                  | 7.24                                               | 6.76            |
| 146        | 111                                              | 66                | 4.5                                        | 0.531                                                       | 0.371       | 0.786                                                  | 7.67                                               | 6.37            |
| 150        | 107                                              | 66                | 4                                          | 0.71                                                        | 0.29        | 0.895                                                  | 9.59                                               | 8.06            |
| 153        | 95                                               | 34                | 3.75                                       | 0.32                                                        | 0.446       | 0.844                                                  | 5.48                                               | 5.57            |
| 144        | 103                                              | 38                | 2.25                                       | 0.209                                                       | 0.559       | 0.209                                                  | 7.54                                               | 7.97            |
| 158        | 101                                              | 93                | 5.25                                       | n/a                                                         | n/a         | n/a                                                    | n/a                                                | n/a             |
